# Supplementary material
Source: PubMed Central journal article supplement (PMC9769026)
Supplement: mmc3.pdf [file mmc3.pdf]

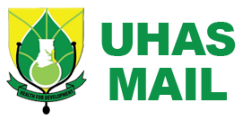

Robert Alhassan <ralhassan@uhas.edu.gh>

---

## Request for permission to use GHS Index 2019 and 2021 Data

4 messages

---

**Robert Alhassan** <ralhassan@uhas.edu.gh>  
To: gwin@nti.org, contact@ghsindex.org

27 June 2022 at 10:52

Dear Cathy and the GHS Index Project Team,  
I trust this email finds you well.  
I am a senior research fellow at the University of Health and Allied Sciences, Ho in Ghana and I wish to seek permission to use the GHS Index data sets of 2019 and 2021. I find the data sets very informative and rich in content. I intend to conduct some analysis with it and possibly publish from it in a peer review journal. The exercise will mainly be for academic purposes only and I will duly acknowledge the Global Health Security Index (GHSI) Project in any publication that emanates from the intended exercise.  
Hope to hear favourably from you.  
Thank you.  
Robert.

**Dean, International Programmes**  
**Senior Research Fellow**  
*Institute of Health Research*  
*University of Health and Allied Sciences (UHAS)*  
*PMB 31, Ho Ghana*  
*Tel: +233(0)241226409/509677764*  
*Email: ralhassan@uhas.edu.gh/arkabason@gmail.com*  
*Skype Address: Robert.Kabah*

---

**Cathy Gwin** <gwin@nti.org>  
To: Robert Alhassan <ralhassan@uhas.edu.gh>  
Cc: Jessica Bell <bell@nti.org>

27 June 2022 at 12:37

Dear Dean Alhassan:

Thank you for your note. Via this email, I am connecting you with my colleague Jessica Bell, who should be able to assist you.

Best,  
Cathy Gwin

NTI

[Quoted text hidden]

---

**contact\_ghsindex** <contact@ghsindex.org>  
To: Robert Alhassan <ralhassan@uhas.edu.gh>  
Cc: Cathy Gwin <gwin@nti.org>, Jessica Bell <bell@nti.org>

5 July 2022 at 16:21

Hello Dr. Alhassan,

Apologies for the delay in responding to your inquiry. The team was a conference last week and had limited email availability.

Thank you very much for showing interest in the Global Health Security (GHS) Index. We are excited that you wish to utilize the Index data to assist your research. The data sets contain publicly available information, so you are allowed to use them we just ask that you use the following citations:

- If you are citing the 2019 GHS Index, please use this citation: Elizabeth E. Cameron, Jennifer B. Nuzzo, and Jessica A. Bell, Global Health Security Index: Building Collective Action and Accountability, 2019. Available: [www.GHSIndex.org](http://www.GHSIndex.org)
- If you are citing the 2021 GHS Index, please use this citation: Jessica A. Bell and Jennifer B. Nuzzo, Global Health Security Index: Advancing Collective Action and Accountability Amid Global Crisis, 2021. Available: [www.GHSIndex.org](http://www.GHSIndex.org)

I hope we were able to answer all your questions. We wish you luck on your research!

Best,

GHS Index Team

[contact@ghsindex.org](mailto:contact@ghsindex.org)

---

**From:** Robert Alhassan <[ralhassan@uhas.edu.gh](mailto:ralhassan@uhas.edu.gh)>

**Date:** Tuesday, July 5, 2022 at 12:05

**To:** Cathy Gwin <[gwin@nti.org](mailto:gwin@nti.org)>, contact\_ghsindex <[contact@ghsindex.org](mailto:contact@ghsindex.org)>

**Subject:** Request for permission to use GHS Index 2019 and 2021 Data

[Quoted text hidden]

---

**Robert Alhassan** <[ralhassan@uhas.edu.gh](mailto:ralhassan@uhas.edu.gh)>

To: contact\_ghsindex <[contact@ghsindex.org](mailto:contact@ghsindex.org)>

Cc: Cathy Gwin <[gwin@nti.org](mailto:gwin@nti.org)>, Jessica Bell <[bell@nti.org](mailto:bell@nti.org)>

5 July 2022 at 16:35

Many thanks for granting us permission to use the data.

You will be duly acknowledged in any publication that comes out of the data set.

Best regards

Robert

[Quoted text hidden]
